# Supplementary material
Source: HighWire-hosted journal article supplement (https://bmjopen.bmj.com/content/14/10/e088069)

Supplementary figure 1 Study participants flow diagram

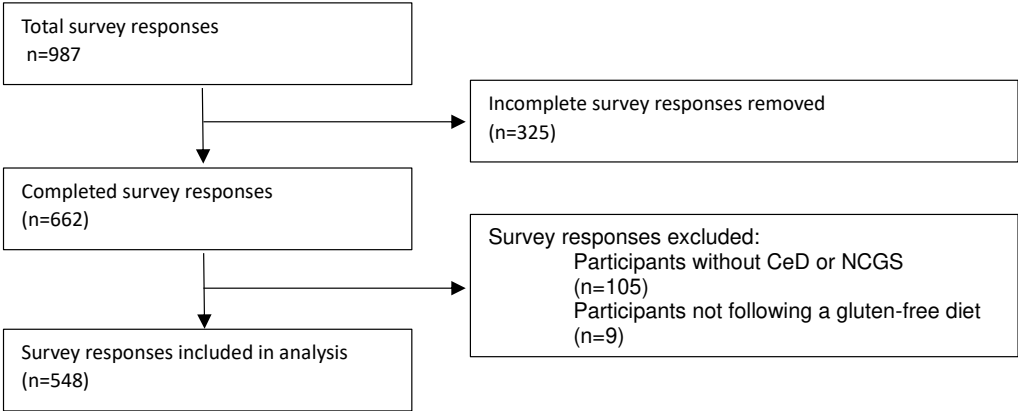

Supplement: inline-supplementary-material-2 [file inline-supplementary-material-2.pdf]
